# Supplementary material for: A comparative study of the effects of phosphatidylserine rich in DHA and EPA on Aβ-induced Alzheimer's disease using cell models
Source: Royal Society of Chemistry journal article supplement (doi:10.1039/d1fo00286d), 2021-01-01
Supplement: d1fo00286d1.pdf [file d1fo00286d1.pdf]

**Supporting information Table S1. Main fatty acid composition of EPA-PS and DHA-PS (% of total FA).**

| Fatty Acid | EPA-PS   | DHA-PS   |
|------------|----------|----------|
| C16:0      | 2.7±0.1  | 24.7±0.5 |
| C18:0      | 2.1±0.2  | 3.6±0.1  |
| C18:1      | 6.3±0.4  | 1.7±0.1  |
| C20:1      | 1.2±0.1  | 4.7±0.3  |
| C20:2      | 2.7±0.1  | 1.2±0.1  |
| C20:3      | 4.3±0.3  | 1.0±0.1  |
| C20:5      | 59.7±0.6 | 11.3±0.4 |
| C22:6      | 9.7±0.3  | 42.2±0.7 |

**A**

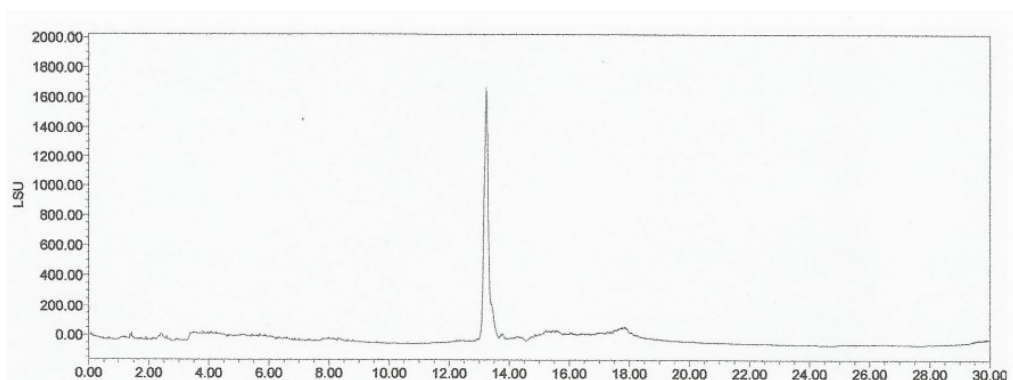

**B**

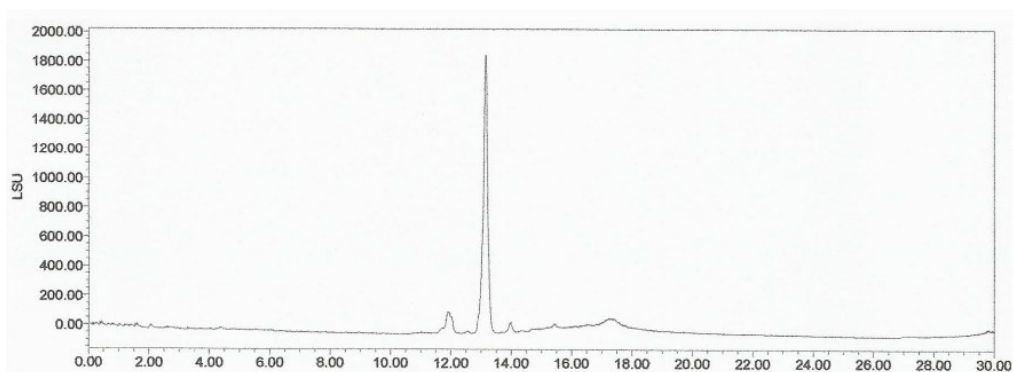

535 Supporting information Figure S1. The structures of EPA-PS (A) and DHA-PS (B) were analyzed  
536 using HPLC.

**A**

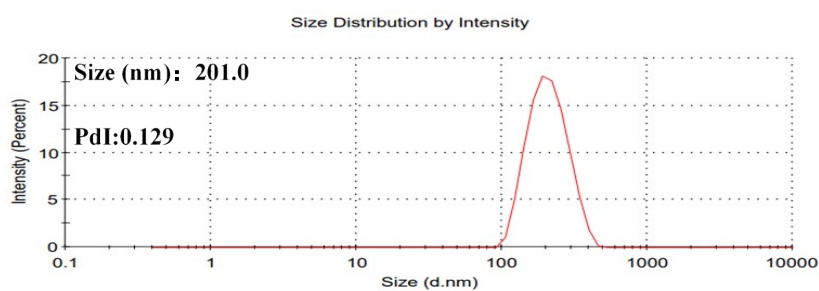

**B**

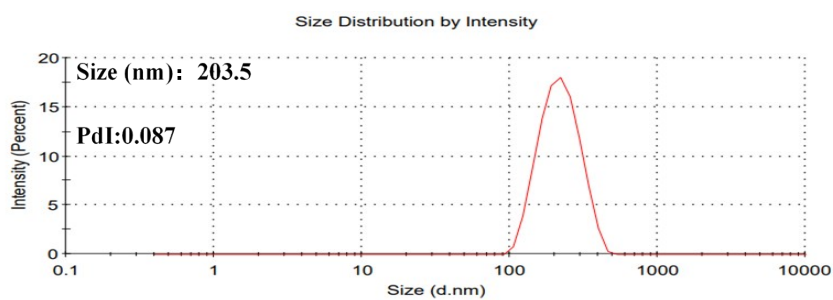

**C**

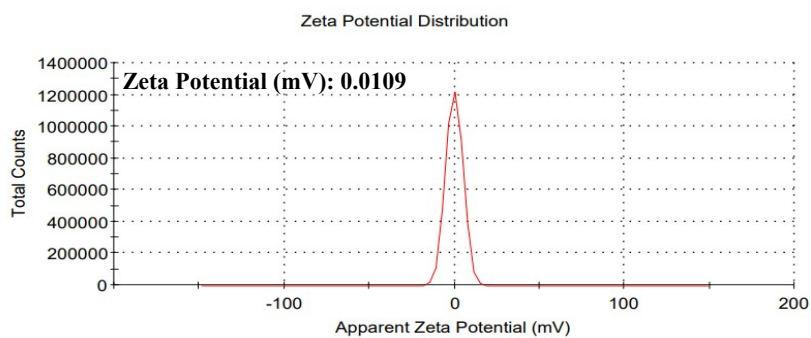

**D**

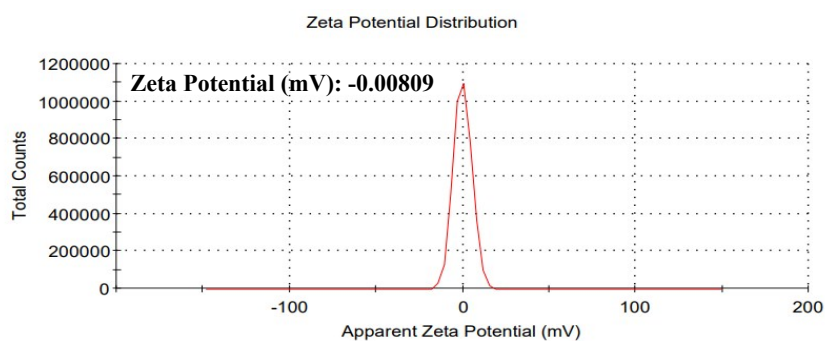

537 Supporting information Figure S2. The particle size distribution and polydispersity index (PDI) of  
 538 liposomes. EPA-PS (A); DHA-PS (B). The particle zeta potential of liposomes. EPA-PS (C);  
 539 DHA-PS (D).
